# Supplementary material
Source: Research Square preprint supplement (doi:10.21203/rs.3.rs-10066697/v1)
Supplement: Supplementary file 1 [file 1541e7b4376eb371fee7c15c.xlsx]

## Sheet: Supplementary_Table_3
Dataset	Cancer_Type	Sample_Count	Patient_Count
BLCA_IMvigor210	BLCA	348	348
BRCA_MEDI4736	BRCA	55	55
BRCA_NCT02032277	BRCA	482	482
GBM_PRJNA482620	GBM/Glioma	34	17
HCC_GSE202069	HCC	41	41
HNSC_GSE159067	HNSCC	102	102
HNSC_GSE195832	HNSCC	56	56
HNSC_GSE210287	HNSCC	22	22
HNSC_GSE235910	HNSCC	26	26
HNSC_GSE93157	HNSCC	5	5
LC_GSE21898	dataset_id	355	355
LGG_E_MTAB_6270	GBM/Glioma	12	12
Melanoma_GSE100797	Melanoma	25	25
Melanoma_GSE106128	Melanoma	35	8
Melanoma_GSE115821	Melanoma	37	37
Melanoma_GSE145996	Melanoma	4	4
Melanoma_Nathanson_2017	Melanoma	24	24
Melanoma_PRJEB23709	Melanoma	91	75
NSCLC_GSE126044	NSCLC	7	7
NSCLC_GSE135222	NSCLC	27	27
RCC_GSE67501	RCC	11	11
STAD_PRJEB25780	Metastatic_gastric_cancer	78	78
