# Supplementary material
Source: Research Square preprint supplement (doi:10.21203/rs.3.rs-10066697/v1)
Supplement: Supplementary file 2 [file 86b57a7e80b222d1f77e7501.xlsx]

## Sheet: Dataset_Stats
Dataset	Cancer Type	Sample_Count	Patient_Count	Title	Abstract	DOI URL
AML_GSE116256	AML	40	21	Clonal replacement of tumor-specific T cells following PD-1 blockade	Immunotherapies that block inhibitory checkpoint receptors on T cells have transformed the clinical care of patients with cancer1. However, whether the T cell response to checkpoint blockade relies on reinvigoration of pre-existing tumor-infiltrating lymphocytes or on recruitment of novel T cells remains unclear2-4. Here we performed paired single-cell RNA and T cell receptor sequencing on 79,046…	https://doi.org/10.1038/s41591-019-0522-3
AML_GSE145410	AML	8	2	Nascent transcript and single-cell RNA-seq analysis defines the mechanism of action of the LSD1 inhibitor INCB059872 in myeloid leukemia	Drugs targeting chromatin-modifying enzymes have entered clinical trials for myeloid malignancies, including INCB059872, a selective irreversible inhibitor of Lysine-Specific Demethylase 1 (LSD1). While initial studies of LSD1 inhibitors suggested these compounds may be used to induce differentiation of acute myeloid leukemia (AML), the mechanisms underlying this effect and dose-limiting toxiciti…	https://doi.org/10.1016/j.gene.2020.144758
BCC_GSE123813	BCC	41	11	Clonal replacement of tumor-specific T cells following PD-1 blockade	Immunotherapies that block inhibitory checkpoint receptors on T cells have transformed the clinical care of patients with cancer1. However, whether the T cell response to checkpoint blockade relies on reinvigoration of pre-existing tumor-infiltrating lymphocytes or on recruitment of novel T cells remains unclear2-4. Here we performed paired single-cell RNA and T cell receptor sequencing on 79,046…	https://doi.org/10.1038/s41591-019-0522-3
BCC_GSE141526	BCC	6	6	AP-1 and TGFß cooperativity drives non-canonical Hedgehog signaling in resistant basal cell carcinoma	Tumor heterogeneity and lack of knowledge about resistant cell states remain a barrier to targeted cancer therapies. Basal cell carcinomas (BCCs) depend on Hedgehog (Hh)/Gli signaling, but can develop mechanisms of Smoothened (SMO) inhibitor resistance. We previously identified a nuclear myocardin-related transcription factor (nMRTF) resistance pathway that amplifies noncanonical Gli1 activity, b…	https://doi.org/10.1038/s41467-020-18762-5
BLCA_GSE145281	BLCA	10	10	High systemic and tumor-associated IL-8 correlates with reduced clinical benefit of PD-L1 blockade	Although elevated plasma interleukin-8 (pIL-8) has been associated with poor outcome to immune checkpoint blockade 1, this has not been comprehensively evaluated in large randomized studies. Here we analyzed circulating pIL-8 and IL8 gene expression in peripheral blood mononuclear cells and tumors of patients treated with atezolizumab (anti-PD-L1 monoclonal antibody) from multiple randomized tria…	https://doi.org/10.1038/s41591-020-0860-1
BLCA_GSE149652	BLCA	14	7	Intratumoral CD4+ T Cells Mediate Anti-tumor Cytotoxicity in Human Bladder Cancer	Responses to anti-PD-1 immunotherapy occur but are infrequent in bladder cancer. The specific T cells that mediate tumor rejection are unknown. T cells from human bladder tumors and non-malignant tissue were assessed with single-cell RNA and paired T cell receptor (TCR) sequencing of 30,604 T cells from 7 patients. We find that the states and repertoires of CD8+ T cells are not distinct in tumors…	https://doi.org/10.1016/j.cell.2020.05.017
BRCA_EMTAB8107	BRCA	14	14	NA	NA	NA
BRCA_GSE110686	BRCA	1	1	Single-cell profiling of breast cancer T cells reveals a tissue-resident memory subset associated with improved prognosis	The quantity of tumor-infiltrating lymphocytes (TILs) in breast cancer (BC) is a robust prognostic factor for improved patient survival, particularly in triple-negative and HER2-overexpressing BC subtypes1. Although T cells are the predominant TIL population2, the relationship between quantitative and qualitative differences in T cell subpopulations and patient prognosis remains unknown. We perfo…	https://doi.org/10.1038/s41591-018-0078-7
BRCA_GSE114727	BRCA	53	11	Single-Cell Map of Diverse Immune Phenotypes in the Breast Tumor Microenvironment	Knowledge of immune cell phenotypes in the tumor microenvironment is essential for understanding mechanisms of cancer progression and immunotherapy response. We profiled 45,000 immune cells from eight breast carcinomas, as well as matched normal breast tissue, blood, and lymph nodes, using single-cell RNA-seq. We developed a preprocessing pipeline, SEQC, and a Bayesian clustering and normalizatio…	https://doi.org/10.1016/j.cell.2018.05.060
BRCA_GSE148673	BRCA	5	5	Delineating copy number and clonal substructure in human tumors from single-cell transcriptomes	Single-cell transcriptomic analysis is widely used to study human tumors. However, it remains challenging to distinguish normal cell types in the tumor microenvironment from malignant cells and to resolve clonal substructure within the tumor. To address these challenges, we developed an integrative Bayesian segmentation approach called copy number karyotyping of aneuploid tumors (CopyKAT) to esti…	https://doi.org/10.1038/s41587-020-00795-2
BRCA_GSE150660	BRCA	3	3	Cancer cells deploy lipocalin-2 to collect limiting iron in leptomeningeal metastasis	The tumor microenvironment plays a critical regulatory role in cancer progression, especially in central nervous system metastases. Cancer cells within the cerebrospinal fluid (CSF)-filled leptomeninges face substantial microenvironmental challenges, including inflammation and sparse micronutrients. To investigate the mechanism by which cancer cells in these leptomeningeal metastases (LM) overcom…	https://doi.org/10.1126/science.aaz2193
BRCA_GSE161529	BRCA	47	41	A single-cell RNA expression atlas of normal, preneoplastic and tumorigenic states in the human breast	To examine global changes in breast heterogeneity across different states, we determined the single-cell transcriptomes of > 340,000 cells encompassing normal breast, preneoplastic BRCA1+/- tissue, the major breast cancer subtypes, and pairs of tumors and involved lymph nodes. Elucidation of the normal breast microenvironment revealed striking changes in the stroma of post-menopausal women. Singl…	https://doi.org/10.15252/embj.2020107333
BRCA_GSE176078	BRCA	1	25	A single-cell and spatially resolved atlas of human breast cancers	Breast cancers are complex cellular ecosystems where heterotypic interactions play central roles in disease progression and response to therapy. However, our knowledge of their cellular composition and organization is limited. Here we present a single-cell and spatially resolved transcriptomics analysis of human breast cancers. We developed a single-cell method of intrinsic subtype classification…	https://doi.org/10.1038/s41588-021-00911-1
CESC_GSE168652	CESC	2	1	Single-cell transcriptomics reveals the landscape of intra-tumoral heterogeneity and transcriptional activities of ECs in CC	Cervical cancer (CC) is the fourth leading cause of deaths in gynecological malignancies. Although the etiology of CC has been extensively investigated, the exact pathogenesis of CC remains incomplete. Recently, single-cell technologies demonstrated advantages in exploring intra-tumoral diversification among various tumor cells. However, single-cell transcriptome analysis (single-cell RNA sequenc…	https://doi.org/10.1016/j.omtn.2021.03.017
CHOL_GSE125449	CHOL	10	10	Tumor Cell Biodiversity Drives Microenvironmental Reprogramming in Liver Cancer	Cellular diversity in tumors is a key factor for therapeutic failures and lethal outcomes of solid malignancies. Here, we determined the single-cell transcriptomic landscape of liver cancer biospecimens from 19 patients. We found varying degrees of heterogeneity in malignant cells within and between tumors and diverse landscapes of tumor microenvironment (TME). Strikingly, tumors with higher tran…	https://doi.org/10.1016/j.ccell.2019.08.007
CHOL_GSE138709	CHOL	8	5	Single-cell transcriptomic architecture and intercellular crosstalk of human intrahepatic cholangiocarcinoma		https://doi.org/10.1016/j.jhep.2020.05.039
CHOL_GSE142784	CHOL	2	2	Single cell transcriptomic architecture and intercellular crosstalk of human intrahepatic cholangiocarcinoma.		https://doi.org/10.1016/j.jhep.2020.05.039
CLL_GSE111014	CLL	12	4	Chromatin mapping and single-cell immune profiling define the temporal dynamics of ibrutinib response in CLL	The Bruton tyrosine kinase (BTK) inhibitor ibrutinib provides effective treatment for patients with chronic lymphocytic leukemia (CLL), despite extensive heterogeneity in this disease. To define the underlining regulatory dynamics, we analyze high-resolution time courses of ibrutinib treatment in patients with CLL, combining immune-phenotyping, single-cell transcriptome profiling, and chromatin m…	https://doi.org/10.1038/s41467-019-14081-6
CLL_GSE125881	CLL	16	4	Clonal kinetics and single-cell transcriptional profiling of CAR-T cells in patients undergoing CD19 CAR-T immunotherapy	Chimeric antigen receptor (CAR) T-cell therapy has produced remarkable anti-tumor responses in patients with B-cell malignancies. However, clonal kinetics and transcriptional programs that regulate the fate of CAR-T cells after infusion remain poorly understood. Here we perform TCRB sequencing, integration site analysis, and single-cell RNA sequencing (scRNA-seq) to profile CD8+ CAR-T cells from …	https://doi.org/10.1038/s41467-019-13880-1
CLL_GSE132065	CLL	5	3	Sampling time-dependent artifacts in single-cell genomics studies	Robust protocols and automation now enable large-scale single-cell RNA and ATAC sequencing experiments and their application on biobank and clinical cohorts. However, technical biases introduced during sample acquisition can hinder solid, reproducible results, and a systematic benchmarking is required before entering large-scale data production. Here, we report the existence and extent of gene ex…	https://doi.org/10.1186/s13059-020-02032-0
CLL_GSE142744	CLL	2	2	Longitudinal CITE-Seq profiling of chronic lymphocytic leukemia during ibrutinib treatment: evolution of leukemic and immune cells at relapse	Background: Ibrutinib, an irreversible Bruton Tyrosine Kinase (BTK) inhibitor, has revolutionized Chronic Lymphocytic Leukemia (CLL) treatment, but resistances to ibrutinib have emerged, whether related or not to BTK mutations. Patterns of CLL evolution under ibrutinib therapy are well characterized for the leukemic cells but not for their microenvironment. Methods: Here, we addressed this questi…	https://doi.org/10.1186/s40364-020-00253-w
CLL_GSE152469	CLL	3	1	Longitudinal CITE-Seq profiling of chronic lymphocytic leukemia during ibrutinib treatment: evolution of leukemic and immune cells at relapse		https://doi.org/10.1186/s40364-020-00253-w
CLL_GSE159417	CLL	2	2	Sc-compReg enables the comparison of gene regulatory networks between conditions using single-cell data	The comparison of gene regulatory networks between diseased versus healthy individuals or between two different treatments is an important scientific problem. Here, we propose sc-compReg as a method for the comparative analysis of gene expression regulatory networks between two conditions using single cell gene expression (scRNA-seq) and single cell chromatin accessibility data (scATAC-seq). Our …	https://doi.org/10.1038/s41467-021-25089-2
CRC_EMTAB8107	CRC	7	7	NA	NA	NA
CRC_GSE108989	CRC	1	12	Lineage tracking reveals dynamic relationships of T cells in colorectal cancer	T cells are key elements of cancer immunotherapy1 but certain fundamental properties, such as the development and migration of T cells within tumours, remain unknown. The enormous T cell receptor (TCR) repertoire, which is required for the recognition of foreign and self-antigens2, could serve as lineage tags to track these T cells in tumours3. Here we obtained transcriptomes of 11,138 single T c…	https://doi.org/10.1038/s41586-018-0694-x
CRC_GSE136394	CRC	16	5	Single-Cell Transcriptome Analysis Reveals Gene Signatures Associated with T-cell Persistence Following Adoptive Cell Therapy	Adoptive cell therapy (ACT) using tumor-infiltrating lymphocytes (TIL) can mediate responses in some patients with metastatic epithelial cancer. Identifying gene signatures associated with successful ACT might enable the development of improved therapeutic approaches. The persistence of transferred T cells in the peripheral blood is one indication of clinical effectiveness, but many T-cell and ho…	https://doi.org/10.1158/2326-6066.CIR-19-0299
CRC_GSE139555	CRC	4	2	Peripheral T cell expansion predicts tumour infiltration and clinical response	Despite the resounding clinical success in cancer treatment of antibodies that block the interaction of PD1 with its ligand PDL11, the mechanisms involved remain unknown. A major limitation to understanding the origin and fate of T cells in tumour immunity is the lack of quantitative information on the distribution of individual clonotypes of T cells in patients with cancer. Here, by performing d…	https://doi.org/10.1038/s41586-020-2056-8
CRC_GSE146771	CRC	44	17	Single-Cell Analyses Inform Mechanisms of Myeloid-Targeted Therapies in Colon Cancer	Single-cell RNA sequencing (scRNA-seq) is a powerful tool for defining cellular diversity in tumors, but its application toward dissecting mechanisms underlying immune-modulating therapies is scarce. We performed scRNA-seq analyses on immune and stromal populations from colorectal cancer patients, identifying specific macrophage and conventional dendritic cell (cDC) subsets as key mediators of ce…	https://doi.org/10.1016/j.cell.2020.03.048
CRC_GSE166555	CRC	25	12	Mitogen-activated protein kinase activity drives cell trajectories in colorectal cancer	In colorectal cancer, oncogenic mutations transform a hierarchically organized and homeostatic epithelium into invasive cancer tissue lacking visible organization. We sought to define transcriptional states of colorectal cancer cells and signals controlling their development by performing single-cell transcriptome analysis of tumors and matched non-cancerous tissues of twelve colorectal cancer pa…	https://doi.org/10.15252/emmm.202114123
CRC_GSE179784	CRC	3	1	Inflammation promotes resistance to immune checkpoint inhibitors in high microsatellite instability colorectal cancer	Inflammation is a common medical complication in colorectal cancer (CRC) patients, which plays significant roles in tumor progression and immunosuppression. However, the influence of inflammatory conditions on the tumor response to immune checkpoint inhibitors (ICI) is incompletely understood. Here we show that in a patient with high microsatellite instability (MSI-H) CRC and a local inflammatory…	https://doi.org/ 10.1038/s41467-022-35096-6
ESCA_GSE160269	ESCA	66	60	Dissecting esophageal squamous-cell carcinoma ecosystem by single-cell transcriptomic analysis	Esophageal squamous-cell carcinoma (ESCC), one of the most prevalent and lethal malignant disease, has a complex but unknown tumor ecosystem. Here, we investigate the composition of ESCC tumors based on 208,659 single-cell transcriptomes derived from 60 individuals. We identify 8 common expression programs from malignant epithelial cells and discover 42 cell types, including 26 immune cell and 16…	https://doi.org/10.1038/s41467-021-25539-x
ESCA_GSE173950	ESCA	29	19	NA	NA	NA
GCTB_GSE168664	GCTB	1	1	NA	NA	NA
GIST_GSE162115	GIST	4	2	Single-cell transcriptome analysis revealed the heterogeneity and microenvironment of gastrointestinal stromal tumors	Gastrointestinal stromal tumor (GIST) is the most common mesenchymal tumor of the human gastrointestinal tract. In this study, we performed single-cell RNA sequencing (RNA-seq) on intra- and peri-tumor tissues from GIST patients with the aim of discovering the heterogeneity of tumor cells in GIST and their interactions with other cells. We found four predominating cell types in GIST tumor tissue,…	https://doi.org/10.1111/cas.14795
Glioma_GSE163108	Glioma	6	32	Inhibitory CD161 receptor identified in glioma-infiltrating T cells by single-cell analysis	T cells are critical effectors of cancer immunotherapies, but little is known about their gene expression programs in diffuse gliomas. Here, we leverage single-cell RNA sequencing (RNA-seq) to chart the gene expression and clonal landscape of tumor-infiltrating T cells across 31 patients with isocitrate dehydrogenase (IDH) wild-type glioblastoma and IDH mutant glioma. We identify potential effect…	https://doi.org/10.1016/j.cell.2021.01.022
HNSC_GSE103322	HNSC	11	11	Single-Cell Transcriptomic Analysis of Primary and Metastatic Tumor Ecosystems in Head and Neck Cancer	The diverse malignant, stromal, and immune cells in tumors affect growth, metastasis, and response to therapy. We profiled transcriptomes of ∼6,000 single cells from 18 head and neck squamous cell carcinoma (HNSCC) patients, including five matched pairs of primary tumors and lymph node metastases. Stromal and immune cells had consistent expression programs across patients. Conversely, malignant c…	https://doi.org/10.1016/j.cell.2017.10.044
HNSC_GSE139324	HNSC	63	37	Immune Landscape of Viral- and Carcinogen-Driven Head and Neck Cancer	Head and neck squamous cell carcinoma (HNSCC) arises through exposure to environmental carcinogens or malignant transformation by human papillomavirus (HPV). Here, we assessed the transcriptional profiles of 131,224 single cells from peripheral and intra-tumoral immune populations from patients with HPV- and HPV+ HNSCC and healthy donors. Immune cells within tumors of HPV- and HPV+ HNSCC displaye…	https://doi.org/10.1016/j.immuni.2019.11.014
HNSC_GSE180268	HNSC	19	6	Functional HPV-specific PD-1+ stem-like CD8 T cells in head and neck cancer	T cells are important in tumour immunity but a better understanding is needed of the differentiation of antigen-specific T cells in human cancer1,2. Here we studied CD8 T cells in patients with human papillomavirus (HPV)-positive head and neck cancer and identified several epitopes derived from HPV E2, E5 and E6 proteins that allowed us to analyse virus-specific CD8 T cells using major histocompa…	https://doi.org/10.1038/s41586-021-03862-z
HNSC_GSE172577	HNSC	6	6	Single-cell profiling of tumor-infiltrating TCF1/TCF7+ T cells reveals a T lymphocyte subset associated with tertiary lymphoid structures/organs and a superior prognosis in oral cancer	Objectives: Despite substantial advances in treatment, clinical outcomes for oral squamous cell carcinoma (OSCC) remain unsatisfactory. Tumor-infiltrating lymphocytes (TILs) are an important prognostic factor for patients and are heterogeneous. Some studies have suggested that TCF1/TCF7+ T cells and tertiary lymphatic structure/organ (TLS) play an important role in tumor immunity. However, how th…	https://doi.org/10.1016/j.oraloncology.2021.105348
KIRC_GSE111360	KIRC	4	2	Organoid Modeling of the Tumor Immune Microenvironment	In vitro cancer cultures, including three-dimensional organoids, typically contain exclusively neoplastic epithelium but require artificial reconstitution to recapitulate the tumor microenvironment (TME). The co-culture of primary tumor epithelia with endogenous, syngeneic tumor-infiltrating lymphocytes (TILs) as a cohesive unit has been particularly elusive. Here, an air-liquid interface (ALI) m…	https://doi.org/10.1016/j.cell.2018.11.021
KIRC_GSE121636	KIRC	6	3	Mapping the immune environment in clear cell renal carcinoma by single-cell genomics	Clear cell renal cell carcinoma (ccRCC) is one of the most immunologically distinct tumor types due to high response rate to immunotherapies, despite low tumor mutational burden. To characterize the tumor immune microenvironment of ccRCC, we applied single-cell-RNA sequencing (SCRS) along with T-cell-receptor (TCR) sequencing to map the transcriptomic heterogeneity of 25,688 individual CD45+ lymp…	https://doi.org/ 10.1038/s42003-020-01625-6
KIRC_GSE139555	KIRC	9	3	Peripheral T cell expansion predicts tumour infiltration and clinical response	Despite the resounding clinical success in cancer treatment of antibodies that block the interaction of PD1 with its ligand PDL11, the mechanisms involved remain unknown. A major limitation to understanding the origin and fate of T cells in tumour immunity is the lack of quantitative information on the distribution of individual clonotypes of T cells in patients with cancer. Here, by performing d…	https://doi.org/10.1038/s41586-020-2056-8
KIRC_GSE145281	KIRC	8	4	High systemic and tumor-associated IL-8 correlates with reduced clinical benefit of PD-L1 blockade	Although elevated plasma interleukin-8 (pIL-8) has been associated with poor outcome to immune checkpoint blockade 1, this has not been comprehensively evaluated in large randomized studies. Here we analyzed circulating pIL-8 and IL8 gene expression in peripheral blood mononuclear cells and tumors of patients treated with atezolizumab (anti-PD-L1 monoclonal antibody) from multiple randomized tria…	https://doi.org/10.1038/s41591-020-0860-1
KIRC_GSE159115	KIRC	12	8	Single-cell analyses of renal cell cancers reveal insights into tumor microenvironment, cell of origin, and therapy response	Diverse subtypes of renal cell carcinomas (RCCs) display a wide spectrum of histomorphologies, proteogenomic alterations, immune cell infiltration patterns, and clinical behavior. Delineating the cells of origin for different RCC subtypes will provide mechanistic insights into their diverse pathobiology. Here, we employed single-cell RNA sequencing (scRNA-seq) to develop benign and malignant rena…	https://doi.org/10.1073/pnas.2103240118
LIHC_GSE98638	LIHC	1	6	Landscape of Infiltrating T Cells in Liver Cancer Revealed by Single-Cell Sequencing	Systematic interrogation of tumor-infiltrating lymphocytes is key to the development of immunotherapies and the prediction of their clinical responses in cancers. Here, we perform deep single-cell RNA sequencing on 5,063 single T cells isolated from peripheral blood, tumor, and adjacent normal tissues from six hepatocellular carcinoma patients. The transcriptional profiles of these individual cel…	https://doi.org/10.1016/j.cell.2017.05.035
LIHC_GSE125449	LIHC	8	8	Tumor Cell Biodiversity Drives Microenvironmental Reprogramming in Liver Cancer	Cellular diversity in tumors is a key factor for therapeutic failures and lethal outcomes of solid malignancies. Here, we determined the single-cell transcriptomic landscape of liver cancer biospecimens from 19 patients. We found varying degrees of heterogeneity in malignant cells within and between tumors and diverse landscapes of tumor microenvironment (TME). Strikingly, tumors with higher tran…	https://doi.org/10.1016/j.ccell.2019.08.007
LIHC_GSE140228	LIHC	55	10	Landscape and Dynamics of Single Immune Cells in Hepatocellular Carcinoma	The immune microenvironment of hepatocellular carcinoma (HCC) is poorly characterized. Combining two single-cell RNA sequencing technologies, we produced transcriptomes of CD45+ immune cells for HCC patients from five immune-relevant sites: tumor, adjacent liver, hepatic lymph node (LN), blood, and ascites. A cluster of LAMP3+ dendritic cells (DCs) appeared to be the mature form of conventional D…	https://doi.org/10.1016/j.cell.2019.10.003
LIHC_GSE146115	LIHC	4	4	Clonal evolution in liver cancer at single-cell and single-variant resolution	Genetic heterogeneity of tumor is closely related to its clonal evolution, phenotypic diversity and treatment resistance, and such heterogeneity has only been characterized at single-cell sub-chromosomal scale in liver cancer. Here we reconstructed the single-variant resolution clonal evolution in human liver cancer based on single-cell mutational profiles. The results indicated that key genetic …	https://doi.org/10.1186/s13045-021-01036-y
LIHC_GSE166635	LIHC	2	2	A TNFR2-hnRNPK Axis Promotes Primary Liver Cancer Development via Activation of YAP Signaling in Hepatic Progenitor Cells	Most primary liver cancer (PLC) cases progress mainly due to underlying chronic liver inflammation, yet the underlying mechanisms of inflammation-mediated PLC remain unclear. Here we uncover a TNF receptor II (TNFR2)-hnRNPK-YAP signaling axis in hepatic progenitor cells (HPC) essential for PLC development. TNFR2, but not TNF receptor I (TNFR1), was required for TNFα-induced activation of YAP duri…	https://doi.org/10.1158/0008-5472.CAN-20-3175
LSCC_GSE150321	LSCC	2	2	Cellular heterogeneity landscape in laryngeal squamous cell carcinoma	Laryngeal squamous cell carcinoma (LSCC) is a highly malignant tumor originated from respiratory system. Although there have been many improvements in therapy until now, reducing the high mortality remains difficult. Understanding the cellular heterogeneity of LSCC could contribute to improve this problem. Single-cell RNA sequencing was applied to dissect the cell composition and molecular charac…	https://doi.org/10.1002/ijc.33192
LUAD_GSE179373	LUAD	2	2	Distinct phenotypic states and spatial distribution of CD8+ T cell clonotypes in human brain metastases	Metastatic disease in the brain is difficult to control and predicts poor prognosis. Here, we analyze human brain metastases and demonstrate their robust infiltration by CD8+ T cell subsets with distinct antigen specificities, phenotypic states, and spatial localization within the tumor microenvironment. Brain metastases are densely infiltrated by T cells; the majority of infiltrating CD8+ T cell…	https://doi.org/10.1016/j.xcrm.2022.100620
LUSC_GSE179373	LUSC	1	1	Distinct phenotypic states and spatial distribution of CD8+ T cell clonotypes in human brain metastases	Metastatic disease in the brain is difficult to control and predicts poor prognosis. Here, we analyze human brain metastases and demonstrate their robust infiltration by CD8+ T cell subsets with distinct antigen specificities, phenotypic states, and spatial localization within the tumor microenvironment. Brain metastases are densely infiltrated by T cells; the majority of infiltrating CD8+ T cell…	https://doi.org/10.1016/j.xcrm.2022.100620
MB_GSE155446	MB	27	25	Neoplastic and immune single-cell transcriptomics define subgroup-specific intra-tumoral heterogeneity of childhood medulloblastoma	Background: Medulloblastoma (MB) is a heterogeneous disease in which neoplastic cells and associated immune cells contribute to disease progression. We aimed to determine the influence of neoplastic and immune cell diversity on MB biology in patient samples and animal models. Methods: To better characterize cellular heterogeneity in MB we used single-cell RNA sequencing, immunohistochemistry, and…	https://doi.org/10.1093/neuonc/noab135
MCC_GSE117988	MCC	6	1	Acquired cancer resistance to combination immunotherapy from transcriptional loss of class I HLA	Understanding mechanisms of late/acquired cancer immunotherapy resistance is critical to improve outcomes; cellular immunotherapy trials offer a means to probe complex tumor-immune interfaces through defined T cell/antigen interactions. We treated two patients with metastatic Merkel cell carcinoma with autologous Merkel cell polyomavirus specific CD8+ T cells and immune-checkpoint inhibitors. In …	NA
MCC_GSE118056	MCC	1	1	Acquired cancer resistance to combination immunotherapy from transcriptional loss of class I HLA	Understanding mechanisms of late/acquired cancer immunotherapy resistance is critical to improve outcomes; cellular immunotherapy trials offer a means to probe complex tumor-immune interfaces through defined T cell/antigen interactions. We treated two patients with metastatic Merkel cell carcinoma with autologous Merkel cell polyomavirus specific CD8+ T cells and immune-checkpoint inhibitors. In …	https://doi.org/10.1038/s41467-018-06300-3
MF_GSE165623	MF	3	1	Single-Cell RNA Sequencing Reveals Tissue Compartment-Specific Plasticity of Mycosis Fungoides Tumor Cells	Mycosis fungoides (MF) is the most common primary cutaneous T-cell lymphoma. While initially restricted to the skin, malignant cells can appear in blood, bone marrow and secondary lymphoid organs in later disease stages. However, only little is known about phenotypic and functional properties of malignant T cells in relationship to tissue environments over the course of disease progression. We th…	https://doi.org/10.3389/fimmu.2021.666935
MF_GSE173820	MF	1	1	Single-cell RNA sequencing profiling in a patient with discordant primary cutaneous B-cell and T-cell lymphoma reveals micromilieu-driven immune skewing	Background: Primary cutaneous lymphomas comprise a heterogeneous group of B-cell and T-cell malignancies which often show an indolent course, but can progress to aggressive disease in a subset of patients. Diagnosis is often delayed owing to clinical and histopathological similarities with benign inflammatory conditions. Especially during early disease, cancer cells are present at relatively low …	https://doi.org/10.1111/bjd.20512
MM_GSE143317	MM	2	1	Homozygous BCMA gene deletion in response to anti-BCMA CAR T cells in a patient with multiple myeloma	B cell maturation antigen (BCMA) is a target for various immunotherapies and a biomarker for tumor load in multiple myeloma (MM). We report a case of irreversible BCMA loss in a patient with MM who was enrolled in the KarMMa trial ( NCT03361748 ) and progressed after anti-BCMA CAR T cell therapy. We identified selection of a clone with homozygous deletion of TNFRSF17 (BCMA) as the underlying mech…	https://doi.org/10.1038/s41591-021-01245-5
MM_GSE151310	MM	5	5	Single-Cell Transcriptomic Analysis Reveals BCMA CAR-T Cell Dynamics in a Patient with Refractory Primary Plasma Cell Leukemia	Chimeric antigen receptor T cell (CAR-T) therapy has revolutionized the clinical treatment of hematological malignancies due to the prominent anti-tumor effects. B cell maturation antigen (BCMA) CAR-T cells have demonstrated promising effects in patients with relapsed/refractory multiple myeloma. However, the dynamics of CAR-T cell proliferation and cytotoxicity in clinical patients remains unexp…	https://doi.org/10.1016/j.ymthe.2020.11.028
MM_GSE161801	MM	77	19	Subclone-specific microenvironmental impact and drug response in refractory multiple myeloma revealed by single-cell transcriptomics	Virtually all patients with multiple myeloma become unresponsive to treatment over time. Relapsed/refractory multiple myeloma (RRMM) is accompanied by the clonal evolution of myeloma cells with heterogeneous genomic aberrations and profound changes of the bone marrow microenvironment (BME). However, the molecular mechanisms that drive drug resistance remain elusive. Here, we analyze the heterogen…	https://doi.org/10.1038/s41467-021-26951-z
MM_GSE164551	MM	8	1	Biallelic loss of BCMA as a resistance mechanism to CAR T cell therapy in a patient with multiple myeloma	BCMA targeting chimeric antigen receptor (CAR) T cell therapy has shown deep and durable responses in multiple myeloma. However, relapse following therapy is frequently observed, and mechanisms of resistance remain ill-defined. Here, we perform single cell genomic characterization of longitudinal samples from a patient who relapsed after initial CAR T cell treatment with lack of response to retre…	https://doi.org/10.1038/s41467-021-21177-5
NB_GSE154037	NB	3	3	Anti-GD2 CAR-NKT cells in patients with relapsed or refractory neuroblastoma: an interim analysis	Vα24-invariant natural killer T (NKT) cells have shown potent anti-tumor properties in murine tumor models and have been linked to favorable outcomes in patients with cancer. However, low numbers of these cells in humans have hindered their clinical applications. Here we report interim results from all three patients enrolled on dose level 1 in a phase 1 dose-escalation trial of autologous NKT ce…	https://doi.org/10.1038/s41591-020-1074-2
NHL_GSE128531	NHL	9	9	Single-Cell Lymphocyte Heterogeneity in Advanced Cutaneous T-cell Lymphoma Skin Tumors	Purpose: The heterogeneity of tumor cells presents a major challenge to cancer diagnosis and therapy. Cutaneous T-cell lymphomas (CTCL) are a group of T lymphocyte malignancies that primarily affect skin. Lack of highly specific markers for malignant lymphocytes prevents early diagnosis, while only limited treatment options are available for patients with advanced stage CTCL. Droplet-based single…	https://doi.org/10.1158/1078-0432.CCR-19-0148
NHL_GSE147944	NHL	3	3	Genome-wide transcriptome analysis of the STAT6-regulated genes in advanced-stage cutaneous T-cell lymphoma	The signal transducer and activator of transcription 6 (STAT6) is a critical up-stream mediator of interleukin-13 (IL-13) and IL-4 signaling and is constitutively activated in malignant lymphocytes from Sezary syndrome (SS) and mycosis fungoides (MF), the most common subtypes of cutaneous T-cell lymphomas. By combining genome-wide expression profiling with pharmacological STAT6 inhibition, we hav…	https://doi.org/10.1182/blood.2019004725
NPC_GSE150430	NPC	15	15	Single-cell transcriptomics reveals regulators underlying immune cell diversity and immune subtypes associated with prognosis in nasopharyngeal carcinoma	Nasopharyngeal carcinoma (NPC) is an aggressive malignancy with extremely skewed ethnic and geographic distributions. Increasing evidence indicates that targeting the tumor microenvironment (TME) represents a promising therapeutic approach in NPC, highlighting an urgent need to deepen the understanding of the complex NPC TME. Here, we generated single-cell transcriptome profiles for 7581 malignan…	https://doi.org/10.1038/s41422-020-0374-x
NPC_GSE162025	NPC	20	10	Tumour heterogeneity and intercellular networks of nasopharyngeal carcinoma at single cell resolution	The heterogeneous nature of tumour microenvironment (TME) underlying diverse treatment responses remains unclear in nasopharyngeal carcinoma (NPC). Here, we profile 176,447 cells from 10 NPC tumour-blood pairs, using single-cell transcriptome coupled with T cell receptor sequencing. Our analyses reveal 53 cell subtypes, including tumour-infiltrating CD8+ T, regulatory T (Treg), and dendritic cell…	https://doi.org/10.1038/s41467-021-21043-4
NSCLC_EMTAB6149	NSCLC	9	9	NA	NA	NA
NSCLC_GSE99254	NSCLC	1	14	Global characterization of T cells in non-small-cell lung cancer by single-cell sequencing	Cancer immunotherapies have shown sustained clinical responses in treating non-small-cell lung cancer1-3, but efficacy varies and depends in part on the amount and properties of tumor infiltrating lymphocytes4-6. To depict the baseline landscape of the composition, lineage and functional states of tumor infiltrating lymphocytes, here we performed deep single-cell RNA sequencing for 12,346 T cells…	https://doi.org/10.1038/s41591-018-0045-3
NSCLC_GSE117570	NSCLC	8	4	Dissecting intratumoral myeloid cell plasticity by single cell RNA-seq	Tumor-infiltrating myeloid cells are the most abundant leukocyte population within tumors. Molecular cues from the tumor microenvironment promote the differentiation of immature myeloid cells toward an immunosuppressive phenotype. However, the in situ dynamics of the transcriptional reprogramming underlying this process are poorly understood. Therefore, we applied single cell RNA-seq (scRNA-seq) …	https://doi.org/10.1002/cam4.2113
NSCLC_GSE127465	NSCLC	26	7	Single-Cell Transcriptomics of Human and Mouse Lung Cancers Reveals Conserved Myeloid Populations across Individuals and Species	Tumor-infiltrating myeloid cells (TIMs) comprise monocytes, macrophages, dendritic cells, and neutrophils, and have emerged as key regulators of cancer growth. These cells can diversify into a spectrum of states, which might promote or limit tumor outgrowth but remain poorly understood. Here, we used single-cell RNA sequencing (scRNA-seq) to map TIMs in non-small-cell lung cancer patients. We unc…	https://doi.org/10.1016/j.immuni.2019.03.009
NSCLC_GSE131907	NSCLC	58	44	Single-cell RNA sequencing demonstrates the molecular and cellular reprogramming of metastatic lung adenocarcinoma	Advanced metastatic cancer poses utmost clinical challenges and may present molecular and cellular features distinct from an early-stage cancer. Herein, we present single-cell transcriptome profiling of metastatic lung adenocarcinoma, the most prevalent histological lung cancer type diagnosed at stage IV in over 40% of all cases. From 208,506 cells populating the normal tissues or early to metast…	https://doi.org/10.1038/s41467-020-16164-1
NSCLC_GSE139555	NSCLC	13	6	Peripheral T cell expansion predicts tumour infiltration and clinical response	Despite the resounding clinical success in cancer treatment of antibodies that block the interaction of PD1 with its ligand PDL11, the mechanisms involved remain unknown. A major limitation to understanding the origin and fate of T cells in tumour immunity is the lack of quantitative information on the distribution of individual clonotypes of T cells in patients with cancer. Here, by performing d…	https://doi.org/10.1038/s41586-020-2056-8
NSCLC_GSE146100	NSCLC	3	1	Multiomics analysis reveals a distinct response mechanism in multiple primary lung adenocarcinoma after neoadjuvant immunotherapy	Multiple primary lung cancer (MPLC) remains a tough challenge to diagnose and treat. Although neoadjuvant immunotherapy has shown promising results in early stage non-small cell lung cancer, whether such modality can benefit all primary lesions remains unclear. Herein, we performed integrated multiomics analysis in one patient with early stage MPLC with remarkable tumor shrinkage in a solid nodul…	https://doi.org/10.1136/jitc-2020-002312
NSCLC_GSE148071	NSCLC	31	31	Single-cell profiling of tumor heterogeneity and the microenvironment in advanced non-small cell lung cancer	Lung cancer is a highly heterogeneous disease. Cancer cells and cells within the tumor microenvironment together determine disease progression, as well as response to or escape from treatment. To map the cell type-specific transcriptome landscape of cancer cells and their tumor microenvironment in advanced non-small cell lung cancer (NSCLC), we analyze 42 tissue biopsy samples from stage III/IV N…	https://doi.org/10.1038/s41467-021-22801-0
NSCLC_GSE150660	NSCLC	2	2	Cancer cells deploy lipocalin-2 to collect limiting iron in leptomeningeal metastasis	The tumor microenvironment plays a critical regulatory role in cancer progression, especially in central nervous system metastases. Cancer cells within the cerebrospinal fluid (CSF)-filled leptomeninges face substantial microenvironmental challenges, including inflammation and sparse micronutrients. To investigate the mechanism by which cancer cells in these leptomeningeal metastases (LM) overcom…	https://doi.org/10.1126/science.aaz2193
NSCLC_GSE162498	NSCLC	16	11	Contribution of resident and circulating precursors to tumor-infiltrating CD8+ T cell populations in lung cancer	Tumor-infiltrating lymphocytes (TILs), in general, and especially CD8+ TILs, represent a favorable prognostic factor in non-small cell lung cancer (NSCLC). The tissue origin, regenerative capacities, and differentiation pathways of TIL subpopulations remain poorly understood. Using a combination of single-cell RNA and T cell receptor (TCR) sequencing, we investigate the functional organization of…	https://doi.org/10.1126/sciimmunol.abd5778
NSCLC_GSE176021	NSCLC	110	16	Transcriptional programs of neoantigen-specific TIL in anti-PD-1-treated lung cancers	PD-1 blockade unleashes CD8 T cells1, including those specific for mutation-associated neoantigens (MANA), but factors in the tumour microenvironment can inhibit these T cell responses. Single-cell transcriptomics have revealed global T cell dysfunction programs in tumour-infiltrating lymphocytes (TIL). However, the majority of TIL do not recognize tumour antigens2, and little is known about tran…	https://doi.org/10.1038/s41586-021-03752-4
NSCLC_GSE179373	NSCLC	3	3	Distinct phenotypic states and spatial distribution of CD8+ T cell clonotypes in human brain metastases	Metastatic disease in the brain is difficult to control and predicts poor prognosis. Here, we analyze human brain metastases and demonstrate their robust infiltration by CD8+ T cell subsets with distinct antigen specificities, phenotypic states, and spatial localization within the tumor microenvironment. Brain metastases are densely infiltrated by T cells; the majority of infiltrating CD8+ T cell…	https://doi.org/10.1016/j.xcrm.2022.100620
OS_GSE162454	OS	6	6	Single-Cell Transcriptomics Reveals the Complexity of the Tumor Microenvironment of Treatment-Naive Osteosarcoma	Osteosarcoma (OS), which occurs most commonly in adolescents, is associated with a high degree of malignancy and poor prognosis. In order to develop an accurate treatment for OS, a deeper understanding of its complex tumor microenvironment (TME) is required. In the present study, tissues were isolated from six patients with OS, and then subjected to single-cell RNA sequencing (scRNA-seq) using a …	https://doi.org/10.3389/fonc.2021.709210
OV_EMTAB8107	OV	5	5	NA	NA	NA
OV_GSE147082	OV	6	6	Characterizing the tumor microenvironment of metastatic ovarian cancer by single-cell transcriptomics	Understanding the cellular composition of the tumor microenvironment and the interactions of the cells is essential to the development of successful immunotherapies in cancer. We perform single-cell RNA sequencing (scRNA-seq) of 9,885 cells isolated from the omentum in 6 patients with ovarian cancer and identify 9 major cell types, including cancer, stromal, and immune cells. Transcriptional anal…	https://doi.org/10.1016/j.celrep.2021.109165
OV_GSE151214	OV	12	8	Single-cell transcriptomics identifies gene expression networks driving differentiation and tumorigenesis in the human fallopian tube	The human fallopian tube harbors the cell of origin for the majority of high-grade serous "ovarian" cancers (HGSCs), but its cellular composition, particularly the epithelial component, is poorly characterized. We perform single-cell transcriptomic profiling of around 53,000 individual cells from 12 primary fallopian specimens to map their major cell types. We identify 10 epithelial subpopulation…	https://doi.org/10.1016/j.celrep.2021.108978
OV_GSE154600	OV	5	5	NA	NA	NA
OV_GSE158722	OV	8	7	Evolution of core archetypal phenotypes in progressive high grade serous ovarian cancer	The evolution of resistance in high-grade serous ovarian cancer (HGSOC) cells following chemotherapy is only partially understood. To understand the selection of factors driving heterogeneity before and through adaptation to treatment, we profile single-cell RNA-sequencing (scRNA-seq) transcriptomes of HGSOC tumors collected longitudinally during therapy. We analyze scRNA-seq data from two indepe…	https://doi.org/10.1038/s41467-021-23171-3
PAAD_CRA001160	PAAD	27	27	NA	NA	NA
PAAD_GSE141017	PAAD	1	1	Single-cell transcriptomes of pancreatic preinvasive lesions and cancer reveal acinar metaplastic cells' heterogeneity	Acinar metaplasia is an initial step in a series of events that can lead to pancreatic cancer. Here we perform single-cell RNA-sequencing of mouse pancreas during the progression from preinvasive stages to tumor formation. Using a reporter gene, we identify metaplastic cells that originated from acinar cells and express two transcription factors, Onecut2 and Foxq1. Further analyses of metaplastic…	https://doi.org/10.1038/s41467-020-18207-z
PAAD_GSE148673	PAAD	2	2	Delineating copy number and clonal substructure in human tumors from single-cell transcriptomes	Single-cell transcriptomic analysis is widely used to study human tumors. However, it remains challenging to distinguish normal cell types in the tumor microenvironment from malignant cells and to resolve clonal substructure within the tumor. To address these challenges, we developed an integrative Bayesian segmentation approach called copy number karyotyping of aneuploid tumors (CopyKAT) to esti…	https://doi.org/10.1038/s41587-020-00795-2
PAAD_GSE154778	PAAD	13	13	Single-cell transcriptome analysis of tumor and stromal compartments of pancreatic ductal adenocarcinoma primary tumors and metastatic lesions	Background: Solid tumors such as pancreatic ductal adenocarcinoma (PDAC) comprise not just tumor cells but also a microenvironment with which the tumor cells constantly interact. Detailed characterization of the cellular composition of the tumor microenvironment is critical to the understanding of the disease and treatment of the patient. Single-cell transcriptomics has been used to study the cel…	https://doi.org/10.1186/s13073-020-00776-9
PAAD_GSE158356	PAAD	5	5	Pancreatic cancer is marked by complement-high blood monocytes and tumor-associated macrophages	Pancreatic ductal adenocarcinoma (PDA) is accompanied by reprogramming of the local microenvironment, but changes at distal sites are poorly understood. We implanted biomaterial scaffolds, which act as an artificial premetastatic niche, into immunocompetent tumor-bearing and control mice, and identified a unique tumor-specific gene expression signature that includes high expression of C1qa, C1qb,…	https://doi.org/10.26508/lsa.202000935
PAAD_GSE162708	PAAD	5	5	Single-cell RNA sequencing reveals spatiotemporal heterogeneity and malignant progression in pancreatic neuroendocrine tumor	Aims: Using Single-cell RNA sequencing (scRNA-seq), we explored the spatiotemporal heterogeneity of pancreatic neuroendocrine tumors (pNETs) and the underlying mechanism for malignant progression. Methods: scRNA-seq was conducted on three tumor tissues (two primary tissues from different sites, one liver metastatic lesion), one normal liver tissue, and peripheral blood mononuclear cells from one …	https://doi.org/10.7150/ijbs.61717
PAAD_GSE165399	PAAD	3	3	Single-cell transcriptomics reveals heterogeneous progression and EGFR activation in pancreatic adenosquamous carcinoma	Pancreatic adenosquamous carcinoma (PASC) - a rare pathological pancreatic cancer (PC) type - has a poor prognosis due to high malignancy. To examine the heterogeneity of PASC, we performed single-cell RNA sequencing (scRNA-seq) profiling with sample tissues from a healthy donor pancreas, an intraductal papillary mucinous neoplasm, and a patient with PASC. Of 9,887 individual cells, ten cell subp…	https://doi.org/10.7150/ijbs.58886
PCFCL_GSE173820	PCFCL	1	1	Single-cell RNA sequencing profiling in a patient with discordant primary cutaneous B-cell and T-cell lymphoma reveals micromilieu-driven immune skewing	Background: Primary cutaneous lymphomas comprise a heterogeneous group of B-cell and T-cell malignancies which often show an indolent course, but can progress to aggressive disease in a subset of patients. Diagnosis is often delayed owing to clinical and histopathological similarities with benign inflammatory conditions. Especially during early disease, cancer cells are present at relatively low …	https://doi.org/10.1111/bjd.20512
PRAD_GSE137829	PRAD	3	3	Single-cell analysis supports a luminal-neuroendocrine transdifferentiation in human prostate cancer	Neuroendocrine prostate cancer is one of the most aggressive subtypes of prostate tumor. Although much progress has been made in understanding the development of neuroendocrine prostate cancer, the cellular architecture associated with neuroendocrine differentiation in human prostate cancer remain incompletely understood. Here, we use single-cell RNA sequencing to profile the transcriptomes of 21…	https://doi.org/10.1038/s42003-020-01476-1
PRAD_GSE141445	PRAD	11	11	Single-cell analysis reveals transcriptomic remodellings in distinct cell types that contribute to human prostate cancer progression	Prostate cancer shows remarkable clinical heterogeneity, which manifests in spatial and clonal genomic diversity. By contrast, the transcriptomic heterogeneity of prostate tumours is poorly understood. Here we have profiled the transcriptomes of 36,424 single cells from 13 prostate tumours and identified the epithelial cells underlying disease aggressiveness. The tumour microenvironment (TME) sho…	https://doi.org/10.1038/s41556-020-00613-6
PRAD_GSE143791	PRAD	31	16	Human prostate cancer bone metastases have an actionable immunosuppressive microenvironment	Bone metastases are devastating complications of cancer. They are particularly common in prostate cancer (PCa), represent incurable disease, and are refractory to immunotherapy. We seek to define distinct features of the bone marrow (BM) microenvironment by analyzing single cells from bone metastatic prostate tumors, involved BM, uninvolved BM, and BM from cancer-free, orthopedic patients, and he…	https://doi.org/10.1016/j.ccell.2021.09.005
PRAD_GSE150692	PRAD	3	3	A single-cell atlas of the mouse and human prostate reveals heterogeneity and conservation of epithelial progenitors	Understanding the cellular constituents of the prostate is essential for identifying the cell of origin for prostate adenocarcinoma. Here, we describe a comprehensive single-cell atlas of the adult mouse prostate epithelium, which displays extensive heterogeneity. We observe distal lobe-specific luminal epithelial populations (LumA, LumD, LumL, and LumV), a proximally enriched luminal population …	https://doi.org/10.7554/eLife.59465
PRAD_GSE172301	PRAD	13	6	Single-cell analysis of mouse and human prostate reveals novel fibroblasts with specialized distribution and microenvironment interactions	Stromal-epithelial interactions are critical to the morphogenesis, differentiation, and homeostasis of the prostate, but the molecular identity and anatomy of discrete stromal cell types is poorly understood. Using single-cell RNA sequencing, we identified and validated the in situ localization of three smooth muscle subtypes (prostate smooth muscle, pericytes, and vascular smooth muscle) and two…	https://doi.org/10.1002/path.5751
PRAD_GSE176031	PRAD	20	8	Single-cell analysis of human primary prostate cancer reveals the heterogeneity of tumor-associated epithelial cell states	Prostate cancer is the second most common malignancy in men worldwide and consists of a mixture of tumor and non-tumor cell types. To characterize the prostate cancer tumor microenvironment, we perform single-cell RNA-sequencing on prostate biopsies, prostatectomy specimens, and patient-derived organoids from localized prostate cancer patients. We uncover heterogeneous cellular states in prostate…	https://doi.org/10.1038/s41467-021-27322-4
SCC_GSE123813	SCC	11	4	Clonal replacement of tumor-specific T cells following PD-1 blockade	Immunotherapies that block inhibitory checkpoint receptors on T cells have transformed the clinical care of patients with cancer1. However, whether the T cell response to checkpoint blockade relies on reinvigoration of pre-existing tumor-infiltrating lymphocytes or on recruitment of novel T cells remains unclear2-4. Here we performed paired single-cell RNA and T cell receptor sequencing on 79,046…	https://doi.org/10.1038/s41591-019-0522-3
SCC_GSE144236	SCC	9	9	Multimodal Analysis of Composition and Spatial Architecture in Human Squamous Cell Carcinoma	To define the cellular composition and architecture of cutaneous squamous cell carcinoma (cSCC), we combined single-cell RNA sequencing with spatial transcriptomics and multiplexed ion beam imaging from a series of human cSCCs and matched normal skin. cSCC exhibited four tumor subpopulations, three recapitulating normal epidermal states, and a tumor-specific keratinocyte (TSK) population unique t…	https://doi.org/10.1016/j.cell.2020.05.039
SCC_GSE145328	SCC	11	11	Decreased cytotoxic T cells and TCR clonality in organ transplant recipients with squamous cell carcinoma	T-cell landscape differences between cutaneous squamous cell carcinoma (cSCC) tumors in immune competent (SCC in IC) and immunocompromised organ transplant recipients (TSCC in OTR) are unclear. We developed an analytical method to define tumor infiltrating lymphocyte (TIL) phenotype in cSCC from immune competent and immune suppressed patients using single-cell TCR sequencing and gene expression d…	https://doi.org/10.1038/s41698-020-0119-9
SCLC_GSE150766	SCLC	1	1	ASCL1 represses a SOX9+ neural crest stem-like state in small cell lung cancer	ASCL1 is a neuroendocrine lineage-specific oncogenic driver of small cell lung cancer (SCLC), highly expressed in a significant fraction of tumors. However, ∼25% of human SCLC are ASCL1-low and associated with low neuroendocrine fate and high MYC expression. Using genetically engineered mouse models (GEMMs), we show that alterations in Rb1/Trp53/Myc in the mouse lung induce an ASCL1+ state of SCL…	https://doi.org/10.1101/gad.348295.121
SKCM_GSE72056	SKCM	1	17	Dissecting the multicellular ecosystem of metastatic melanoma by single-cell RNA-seq	To explore the distinct genotypic and phenotypic states of melanoma tumors, we applied single-cell RNA sequencing (RNA-seq) to 4645 single cells isolated from 19 patients, profiling malignant, immune, stromal, and endothelial cells. Malignant cells within the same tumor displayed transcriptional heterogeneity associated with the cell cycle, spatial context, and a drug-resistance program. In parti…	https://doi.org/10.1126/science.aad0501
SKCM_GSE115978	SKCM	43	31	A Cancer Cell Program Promotes T Cell Exclusion and Resistance to Checkpoint Blockade	Immune checkpoint inhibitors (ICIs) produce durable responses in some melanoma patients, but many patients derive no clinical benefit, and the molecular underpinnings of such resistance remain elusive. Here, we leveraged single-cell RNA sequencing (scRNA-seq) from 33 melanoma tumors and computational analyses to interrogate malignant cell states that promote immune evasion. We identified a resist…	https://doi.org/10.1016/j.cell.2018.09.006
SKCM_GSE120575	SKCM	96	32	Defining T Cell States Associated with Response to Checkpoint Immunotherapy in Melanoma	Treatment of cancer has been revolutionized by immune checkpoint blockade therapies. Despite the high rate of response in advanced melanoma, the majority of patients succumb to disease. To identify factors associated with success or failure of checkpoint therapy, we profiled transcriptomes of 16,291 individual immune cells from 48 tumor samples of melanoma patients treated with checkpoint inhibit…	https://doi.org/10.1016/j.cell.2018.10.038
SKCM_GSE123139	SKCM	1	23	Dysfunctional CD8 T Cells Form a Proliferative, Dynamically Regulated Compartment within Human Melanoma	Tumor immune cell compositions play a major role in response to immunotherapy, but the heterogeneity and dynamics of immune infiltrates in human cancer lesions remain poorly characterized. Here, we identify conserved intratumoral CD4 and CD8 T cell behaviors in scRNA-seq data from 25 melanoma patients. We discover a large population of CD8 T cells showing continuous progression from an early effe…	https://doi.org/10.1016/j.cell.2018.11.043
SKCM_GSE134388	SKCM	1	1	ALKBH5 regulates anti-PD-1 therapy response by modulating lactate and suppressive immune cell accumulation in tumor microenvironment	Although immune checkpoint blockade (ICB) therapy has revolutionized cancer treatment, many patients do not respond or develop resistance to ICB. N6 -methylation of adenosine (m6A) in RNA regulates many pathophysiological processes. Here, we show that deletion of the m6A demethylase Alkbh5 sensitized tumors to cancer immunotherapy. Alkbh5 has effects on m6A density and splicing events in tumors d…	https://doi.org/10.1073/pnas.1918986117
SKCM_GSE139249	SKCM	8	5	Discovery of specialized NK cell populations infiltrating human melanoma metastases	NK cells contribute to protective antitumor immunity, but little is known about the functional states of NK cells in human solid tumors. To address this issue, we performed single-cell RNA-seq analysis of NK cells isolated from human melanoma metastases, including lesions from patients who had progressed following checkpoint blockade. This analysis identified major differences in the transcriptio…	https://doi.org/10.1172/jci.insight.133103
SKCM_GSE148190	SKCM	6	3	Layilin augments integrin activation to promote antitumor immunity	Tumor-infiltrating CD8+ T cells mediate antitumor immune responses. However, the mechanisms by which T cells remain poised to kill cancer cells despite expressing high levels of inhibitory receptors are unknown. Here, we report that layilin, a C-type lectin domain-containing membrane glycoprotein, is selectively expressed on highly activated, clonally expanded, but phenotypically exhausted CD8+ T…	https://doi.org/10.1084/jem.20192080
SKCM_GSE159251	SKCM	11	4	Single-cell analyses identify circulating anti-tumor CD8 T cells and markers for their enrichment	The ability to monitor anti-tumor CD8+ T cell responses in the blood has tremendous therapeutic potential. Here, we used paired single-cell RNA and TCR sequencing to detect and characterize "tumor-matching" (TM) CD8+ T cells in the blood of mice with MC38 tumors or melanoma patients using the TCR as a molecular barcode. TM cells showed increased activation compared with nonmatching T cells in blo…	https://doi.org/10.1084/jem.20200920
SKCM_GSE166181	SKCM	132	20	Circulating mucosal-associated invariant T cells identify patients responding to anti-PD-1 therapy	Immune checkpoint inhibitors are used for treating patients with metastatic melanoma. Since the response to treatment is variable, biomarkers are urgently needed to identify patients who may benefit from such therapy. Here, we combine single-cell RNA-sequencing and multiparameter flow cytometry to assess changes in circulating CD8+ T cells in 28 patients with metastatic melanoma starting anti-PD-…	https://doi.org/10.1038/s41467-021-21928-4
SKCM_GSE179373	SKCM	2	2	Distinct phenotypic states and spatial distribution of CD8+ T cell clonotypes in human brain metastases	Metastatic disease in the brain is difficult to control and predicts poor prognosis. Here, we analyze human brain metastases and demonstrate their robust infiltration by CD8+ T cell subsets with distinct antigen specificities, phenotypic states, and spatial localization within the tumor microenvironment. Brain metastases are densely infiltrated by T cells; the majority of infiltrating CD8+ T cell…	https://doi.org/10.1016/j.xcrm.2022.100620
SS_GSE131309	SS	11	7	Opposing immune and genetic mechanisms shape oncogenic programs in synovial sarcoma	Synovial sarcoma (SyS) is an aggressive neoplasm driven by the SS18-SSX fusion, and is characterized by low T cell infiltration. Here, we studied the cancer-immune interplay in SyS using an integrative approach that combines single-cell RNA sequencing (scRNA-seq), spatial profiling and genetic and pharmacological perturbations. scRNA-seq of 16,872 cells from 12 human SyS tumors uncovered a malign…	https://doi.org/10.1038/s41591-020-01212-6
STAD_GSE134520	STAD	13	13	Dissecting the Single-Cell Transcriptome Network Underlying Gastric Premalignant Lesions and Early Gastric Cancer	Intestinal-type gastric cancer is preceded by premalignant lesions, including chronic atrophic gastritis and intestinal metaplasia. In this study, we constructed a single-cell atlas for 32,332 high-quality cells from gastric antral mucosa biopsies of patients spanning a cascade of gastric premalignant lesions and early gastric cancer (EGC) using single-cell RNA sequencing. We then constructed a s…	https://doi.org/10.1016/j.celrep.2019.04.052
STAD_GSE167297	STAD	14	5	Spatially Distinct Reprogramming of the Tumor Microenvironment Based On Tumor Invasion in Diffuse-Type Gastric Cancers	Purpose: Histologic features of diffuse-type gastric cancer indicate that the tumor microenvironment (TME) may substantially impact tumor invasiveness. However, cellular components and molecular features associated with cancer invasiveness in the TME of diffuse-type gastric cancers are poorly understood. Experimental design: We performed single-cell RNA-sequencing (scRNA-seq) using tissue samples…	https://doi.org/10.1158/1078-0432.CCR-21-0792
THCA_GSE148673	THCA	5	5	Delineating copy number and clonal substructure in human tumors from single-cell transcriptomes	Single-cell transcriptomic analysis is widely used to study human tumors. However, it remains challenging to distinguish normal cell types in the tumor microenvironment from malignant cells and to resolve clonal substructure within the tumor. To address these challenges, we developed an integrative Bayesian segmentation approach called copy number karyotyping of aneuploid tumors (CopyKAT) to esti…	https://doi.org/10.1038/s41587-020-00795-2
UCEC_GSE139555	UCEC	5	3	Peripheral T cell expansion predicts tumour infiltration and clinical response	Despite the resounding clinical success in cancer treatment of antibodies that block the interaction of PD1 with its ligand PDL11, the mechanisms involved remain unknown. A major limitation to understanding the origin and fate of T cells in tumour immunity is the lack of quantitative information on the distribution of individual clonotypes of T cells in patients with cancer. Here, by performing d…	https://doi.org/10.1038/s41586-020-2056-8
UVM_GSE139829	UVM	11	11	Single-cell analysis reveals new evolutionary complexity in uveal melanoma	Uveal melanoma (UM) is a highly metastatic cancer that, in contrast to cutaneous melanoma, is largely unresponsive to checkpoint immunotherapy. Here, we interrogate the tumor microenvironment at single-cell resolution using scRNA-seq of 59,915 tumor and non-neoplastic cells from 8 primary and 3 metastatic samples. Tumor cells reveal novel subclonal genomic complexity and transcriptional states. T…	https://doi.org/10.1038/s41467-019-14256-1
UVM_GSE169609	UVM	2	2	Splicing Patterns in SF3B1-Mutated Uveal Melanoma Generate Shared Immunogenic Tumor-Specific Neoepitopes	Disruption of splicing patterns due to mutations of genes coding splicing factors in tumors represents a potential source of tumor neoantigens, which would be both public (shared between patients) and tumor-specific (not expressed in normal tissues). In this study, we show that mutations of the splicing factor SF3B1 in uveal melanoma generate such immunogenic neoantigens. Memory CD8+ T cells spec…	https://doi.org/10.1158/2159-8290.CD-20-0555
