# Supplementary material
Source: Research Square preprint supplement (doi:10.21203/rs.3.rs-10066697/v1)
Supplement: Supplementary file 3 [file d3c446b136d0e1bbbe524d2d.xlsx]

## Sheet: Sheet 1
Dataset	Sample_Count	Patient_Count	Title	Abstract	DOI URL
GSE139324	63	37	Immune Landscape of Viral- and Carcinogen-Driven Head and Neck Cancer	Head and neck squamous cell carcinoma (HNSCC) arises through exposure to environmental carcinogens or malignant transformation by human papillomavirus (HPV). Here, we assessed the transcriptional profiles of 131,224 single cells from peripheral and intra-tumoral immune populations from patients with HPV- and HPV+ HNSCC and healthy donors. Immune cells within tumors of HPV- and HPV+ HNSCC displaye…	https://doi.org/10.1016/j.immuni.2019.11.014
GSE152042	4	4	Defining human mesenchymal and epithelial heterogeneity in response to oral inflammatory disease	Human oral soft tissues provide the first barrier of defence against chronic inflammatory disease and hold a remarkable scarless wounding phenotype. Tissue homeostasis requires coordinated actions of epithelial, mesenchymal, and immune cells. However, the extent of heterogeneity within the human oral mucosa and how tissue cell types are affected during the course of disease progression is unknown…	https://doi.org/10.7554/eLife.62810
GSE164241	29	21	Human oral mucosa cell atlas reveals a stromal-neutrophil axis regulating tissue immunity	The oral mucosa remains an understudied barrier tissue. This is a site of rich exposure to antigens and commensals, and a tissue susceptible to one of the most prevalent human inflammatory diseases, periodontitis. To aid in understanding tissue-specific pathophysiology, we compile a single-cell transcriptome atlas of human oral mucosa in healthy individuals and patients with periodontitis. We unc…	https://doi.org/10.1016/j.cell.2021.05.013
GSE171213	12	12	Single-cell RNA landscape of the osteoimmunology microenvironment in periodontitis	Single-cell RNA sequencing (scRNA-seq) enables specific profiling of cell populations at single-cell resolution. The osteoimmunology microenvironment in the occurrence and development of periodontitis remains poorly understood at the single-cell level. In this study, we used single-cell transcriptomics to comprehensively reveal the complexities of the molecular components and differences with cou…	https://doi.org/10.7150/thno.65694
GSE172577	6	6	Single-cell profiling of tumor-infiltrating TCF1/TCF7+ T cells reveals a T lymphocyte subset associated with tertiary lymphoid structures/organs and a superior prognosis in oral cancer	Objectives: Despite substantial advances in treatment, clinical outcomes for oral squamous cell carcinoma (OSCC) remain unsatisfactory. Tumor-infiltrating lymphocytes (TILs) are an important prognostic factor for patients and are heterogeneous. Some studies have suggested that TCF1/TCF7+ T cells and tertiary lymphatic structure/organ (TLS) play an important role in tumor immunity. However, how th…	https://doi.org/10.1016/j.oraloncology.2021.105348
GSE173468	18	14	Pan-cancer T cell atlas links a cellular stress response state to immunotherapy resistance	Tumor-infiltrating T cells offer a promising avenue for cancer treatment, yet their states remain to be fully characterized. Here we present a single-cell atlas of T cells from 308,048 transcriptomes across 16 cancer types, uncovering previously undescribed T cell states and heterogeneous subpopulations of follicular helper, regulatory and proliferative T cells. We identified a unique stress resp…	https://doi.org/10.1038/s41591-023-02371-y
GSE181688	3	3	Single-Cell Sequencing Unveils the Heterogeneity of Nonimmune Cells in Chronic Apical Periodontitis	Chronic apical periodontitis (CAP) is a unique dynamic interaction between microbial invasions and host defense mechanisms, resulting in infiltration of immune cells, bone absorption, and periapical granuloma formation. To help to understand periapical tissue pathophysiology, we constituted a single-cell atlas for 26,737 high-quality cells from inflammatory periapical tissue and uncovered the com…	https://doi.org/10.3389/fcell.2021.820274
GSE181919	37	23	Single-cell transcriptome profiling of the stepwise progression of head and neck cancer	Head and neck squamous cell carcinoma (HNSCC) undergoes stepwise progression from normal tissues to precancerous leukoplakia, primary HNSCC, and metastasized tumors. To delineate the heterogeneity of tumor cells and their interactions during the progression of HNSCC, we employ single-cell RNA-seq profiling for normal to metastasized tumors. We can identify the carcinoma in situ cells in leukoplak…	https://doi.org/10.1038/s41467-023-36691-x
GSE185965	3	3	Ferroptosis Signature Shapes the Immune Profiles to Enhance the Response to Immune Checkpoint Inhibitors in Head and Neck Cancer	As a type of immunogenic cell death, ferroptosis participates in the creation of immunoactive tumor microenvironments. However, knowledge of spatial location of tumor cells with ferroptosis signature in tumor environments and the role of ferroptotic stress in inducing the expression of immune-related molecules in cancer cells is limited. Here the spatial association of the transcriptomic signatur…	https://doi.org/10.1002/advs.202204514
GSE188737	13	13	Single cell analysis in head and neck cancer reveals potential immune evasion mechanisms during early metastasis	Profiling tumors at single-cell resolution provides an opportunity to understand complexities underpinning lymph-node metastases in head and neck squamous-cell carcinoma. Single-cell RNAseq (scRNAseq) analysis of cancer-cell trajectories identifies a subpopulation of pre-metastatic cells, driven by actionable pathways including AXL and AURK. Blocking these two proteins blunts tumor invasion in pa…	https://doi.org/10.1038/s41467-023-37379-y
GSE197680	2	2	Single-cell RNA sequencing combined with proteomics of infected macrophages reveals prothymosin-α as a target for treatment of apical periodontitis	Introduction:Chronic apical periodontitis (CAP) is a common infectious disease of the oral cavity. Immune responses and osteoclastogenesis of monocytes/macrophages play a crucial role in CAP progression, and this study want to clarify role of monocytes/macrophages in CAP, which will contribute to treatment of CAP. Objectives:We aim to explore the heterogeneity of monocyte populations in periapica…	https://doi.org/10.1016/j.jare.2024.01.018
GSE200996	25	24	Tissue-resident memory and circulating T cells are early responders to pre-surgical cancer immunotherapy	Neoadjuvant immune checkpoint blockade has shown promising clinical activity. Here, we characterized early kinetics in tumor-infiltrating and circulating immune cells in oral cancer patients treated with neoadjuvant anti-PD-1 or anti-PD-1/CTLA-4 in a clinical trial (NCT02919683). Tumor-infiltrating CD8 T cells that clonally expanded during immunotherapy expressed elevated tissue-resident memory a…	https://doi.org/10.1016/j.cell.2022.06.018
GSE207502	3	3	Mural cell composition and functional analysis in the healing process of human gingiva from periodontal intrabony defects	Objective: To evaluate the composition and function of mural cell populations in human gingival tissues DESIGN: A cross-sectional study was conducted on seven periodontitis (stage Ⅲ) patients. Gingival tissues were collected two months after scaling and root planing and divided into 3 groups: 1, h_h group (horizontal bone resorption, residual pocket depth ≤3 mm); 2, v_h group (vertical bone resor…	https://doi.org/10.1016/j.archoralbio.2023.105687
GSE211630	6	6	CD8+ tissue-resident memory T cells induce oral lichen planus erosion via cytokine network	CD8+ tissue-resident memory T (CD8+ Trm) cells play key roles in many immune-inflammation-related diseases. However, their characteristics in the pathological process of oral lichen planus (OLP) remains unclear. Therefore, we investigated the function of CD8+ Trm cells in the process of OLP. By using single-cell RNA sequencing profiling and spatial transcriptomics, we revealed that CD8+ Trm cells…	https://doi.org/10.7554/eLife.83981
GSE215403	12	12	Single-cell transcriptomic analysis of gingivo-buccal oral cancer reveals two dominant cellular programs	Oral squamous cell carcinoma of the gingivo-buccal region (OSCC-GB) is the most common cancer among men in India, and is associated with poor prognosis and frequent recurrence. Cellular heterogeneity in OSCC-GB was investigated by single-cell RNA sequencing of tumors derived from the oral cavity of 12 OSCC-GB patients, 3 of whom had concomitant presence of a precancerous lesion (oral submucous fi…	https://doi.org/10.1111/cas.15979
GSE234933	52	52	CXCL9:SPP1 macrophage polarity identifies a network of cellular programs that control human cancers	Tumor microenvironments (TMEs) influence cancer progression but are complex and often differ between patients. Considering that microenvironment variations may reveal rules governing intratumoral cellular programs and disease outcome, we focused on tumor-to-tumor variation to examine 52 head and neck squamous cell carcinomas. We found that macrophage polarity-defined by CXCL9 and SPP1 (CS) expres…	https://doi.org/10.1126/science.ade2292
GSE243359	2	2	NA	NA	NA
GSE266897	4	4	Single-cell and spatially resolved interactomics of tooth-associated keratinocytes in periodontitis	Periodontitis affects billions of people worldwide. To address relationships of periodontal niche cell types and microbes in periodontitis, we generated an integrated single-cell RNA sequencing (scRNAseq) atlas of human periodontium (34-sample, 105918-cell), including sulcular and junctional keratinocytes (SK/JKs). SK/JKs displayed altered differentiation states and were enriched for effector cyt…	https://doi.org/10.1038/s41467-024-49037-y
